# Supplementary material
Source: PubMed Central journal article supplement (PMC9887933)

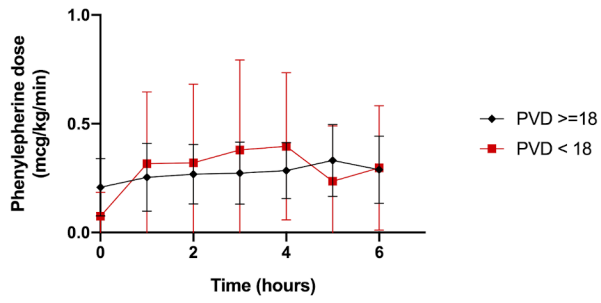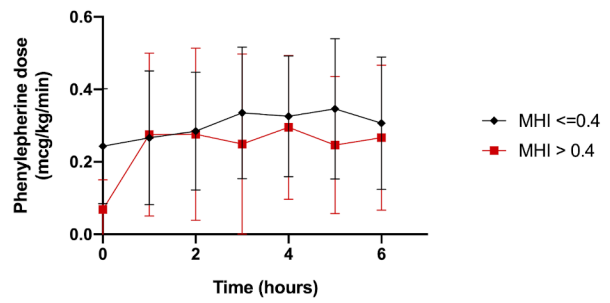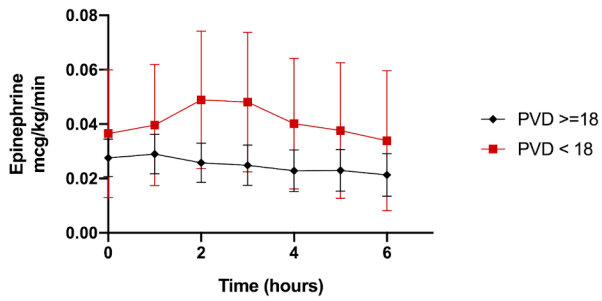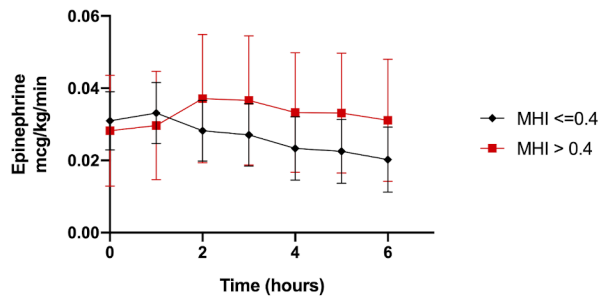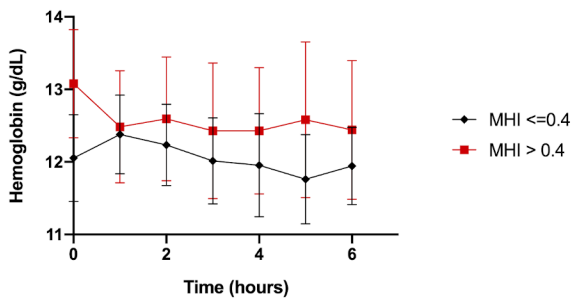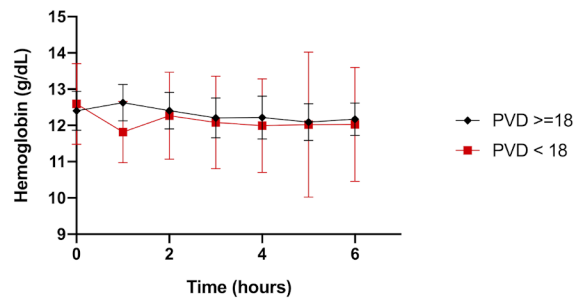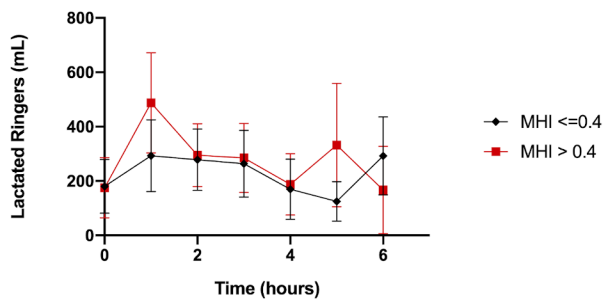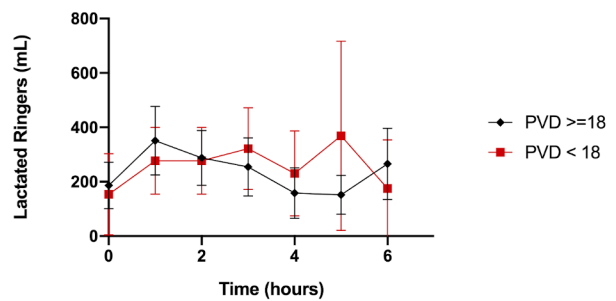

Supplement: NIHMS1855524-supplement-Supplement_Figure_1.pdf [file NIHMS1855524-supplement-Supplement_Figure_1.pdf]
